# Supplementary material
Source: publisher figshare collection journal article supplement (https://acs.figshare.com/ndownloader/files/3714364)
Supplement: Supplementary file 1 [file 3714364]

**Supporting Information for:**

**Supramolecular Fibers In Gels Can Be At**

**Thermodynamic Equilibrium: A Simple Packing Model**

**Reveals Preferential Fibril Formation *Versus***

**Crystallization**

Ivan Ramos Sasselli,<sup>†</sup> Peter J. Halling,<sup>†</sup> Rein V. Ulijn,<sup>\*,†,‡</sup> and Tell Tuttle<sup>\*,†</sup>

<sup>†</sup> Pure and Applied Chemistry Department, WestCHEM, University of Strathclyde, 295 Cathedral Street, Glasgow, G1 1XL, UK.

<sup>‡</sup> Advanced Science Research Center and Hunter College, City University of New York, 85 St Nicholas Terrace, New York, NY 10031, USA.

**KEYWORDS** Low molecular weight gelators, amphiphiles, soft-matter, gel, self-assembly, thermodynamics, packing, model

### Sq Formulation:

Table S1. Expressions for the calculation of the fiber Gibbs energy ( $G_{fiber}$ ) for Sq with the different values of  $n$ .

|                       |                                                                                                                                      |
|-----------------------|--------------------------------------------------------------------------------------------------------------------------------------|
| <b>Sq<sub>0</sub></b> | $G_{fiber} = (2f_2 + f_1) \cdot \gamma_{ks} + (4f_2 + 5f_1 + 6f_0) \cdot \gamma_{kb}$                                                |
| <b>Sq<sub>1</sub></b> | $G_{fiber} = (f_2 + f_1) \cdot \gamma_{ls} + f_0 \cdot \gamma_{lb} + f_2 \cdot \gamma_{ks} + (4f_2 + 5f_1 + 5f_0) \cdot \gamma_{kb}$ |
| <b>Sq<sub>2</sub></b> | $G_{fiber} = (2f_2 + f_1) \cdot \gamma_{ls} + (f_1 + 2f_0) \cdot \gamma_{lb} + (4f_2 + 4f_1 + 4f_0) \cdot \gamma_{kb}$               |
| <b>Sq<sub>3</sub></b> | $G_{fiber} = (2f_2 + f_1) \cdot \gamma_{ls} + (f_2 + 2f_1 + 3f_0) \cdot \gamma_{lb} + (3f_2 + 3f_1 + 3f_0) \cdot \gamma_{kb}$        |

Table S2. Expressions and minimum values for the crystal Gibbs energy ( $G_{crys}$ ) and solvation excess Gibbs energies ( $G_{solv}$ ) for Sq with the different values of  $n$ .

|                       | $G_{crys}$                                  | $G_{solv}$                                  | $G_{crys,min}$ | $G_{solv,min}$ |
|-----------------------|---------------------------------------------|---------------------------------------------|----------------|----------------|
| <b>Sq<sub>0</sub></b> | $6 \cdot \gamma_{kb}$                       | $6 \cdot \gamma_{ks}$                       | 6              | 12             |
| <b>Sq<sub>1</sub></b> | $\gamma_{lb} + 5 \cdot \gamma_{kb}$         | $\gamma_{ls} + 5 \cdot \gamma_{ks}$         | 5              | 10             |
| <b>Sq<sub>2</sub></b> | $2 \cdot \gamma_{lb} + 4 \cdot \gamma_{kb}$ | $2 \cdot \gamma_{ls} + 4 \cdot \gamma_{ks}$ | 4              | 8              |
| <b>Sq<sub>3</sub></b> | $3 \cdot \gamma_{lb} + 3 \cdot \gamma_{kb}$ | $3 \cdot \gamma_{ls} + 3 \cdot \gamma_{ks}$ | 3              | 6              |

**Regular Shapes:**

Squares based prisms may not always be the best way of representing LMWGs but the theory can be extended to other prisms: with triangular (*Tr*) and with hexagonal (*Hx*) base. These are with *Sq* the simplest prism with perfect packing in the cross sections. All the faces are considered to have the same area. The formulation was derived as described for *Sq*. *Hx* show a main difference with the other two units, their fiber faces units expose 2 faces to the solvent ( $m=2$ ) and the corner units 3 ( $m_{max}=3$ ), while for *Sq* and *Tr* they are 1 and 2 respectively (Fig. S1).

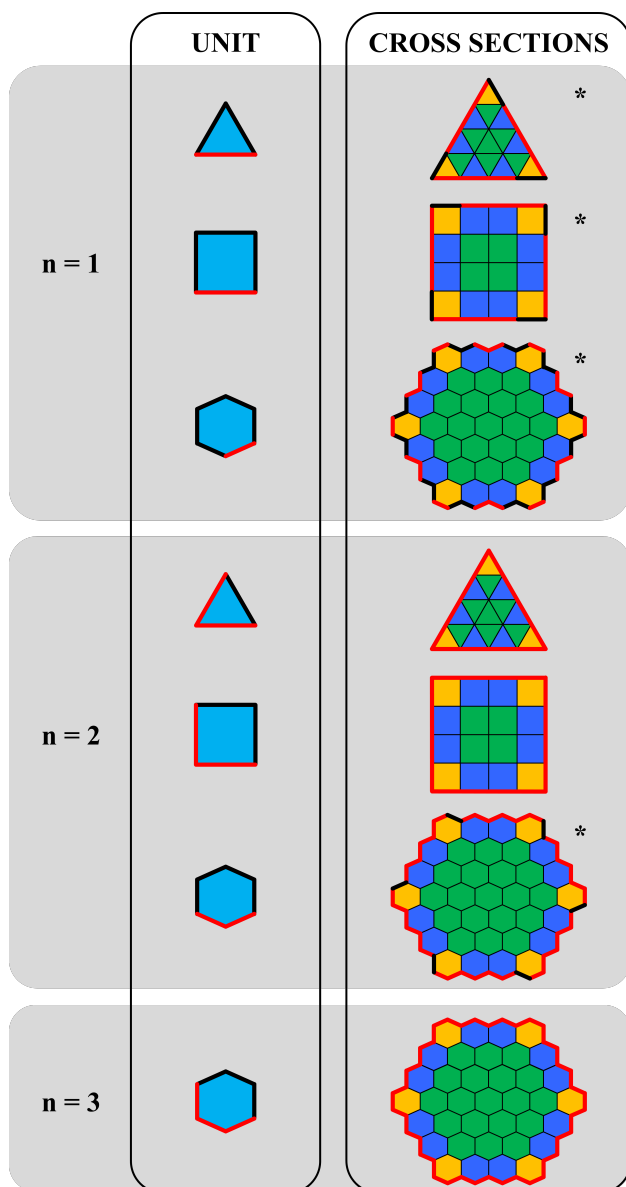

Figure S1. Cross sections of the three shapes with  $n=1$  and  $n=2$  for the three and with  $n=3$  for the hexagons. It shows solvophilic faces (red) and solvophobic faces (black) exposed to the solvent. The cross sections show buried units in green, units on the fiber faces in blue and units in the fiber corners in yellow ( $m_{max}$ ). \*Cross sections which propitiate fibers exposing both solvophilic and – phobic faces to the solvent.

The  $f_m$  changes with  $d$  differ for the different shapes (Fig. S2). All have in common the fast decrement of  $f_{max}$  and that the three components are important at low  $d$ 's.  $Sq$  is the only unit which has only corner units at  $d=0$  and the fraction of core units increases the



fastest for  $Hx$ . The formulation for different shapes gives different possibilities to fit the model to real LMWG.

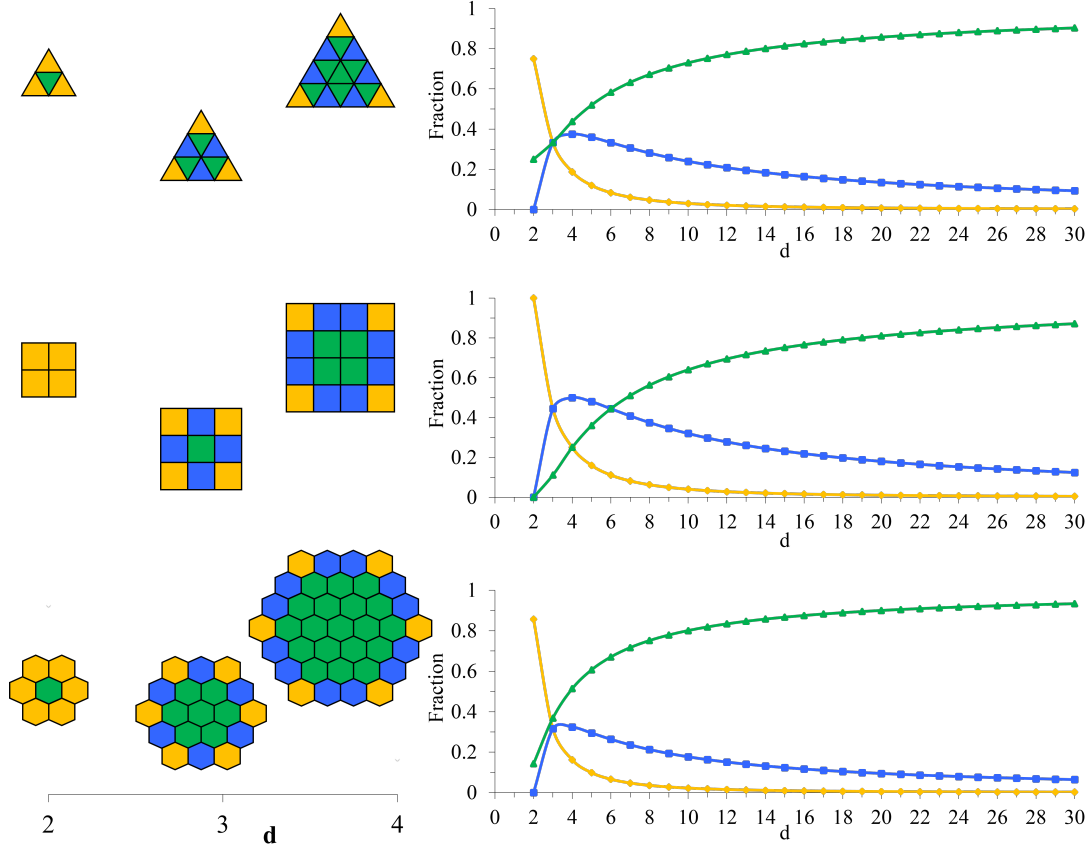

Figure S2. Evolution of the fractions of units which can be buried (green), on the faces of the fiber (blue) and on the corners of the fiber (yellow) as a function of  $d$ , for the different units. Examples for  $d=2-4$  (left) and graphic for  $d=2-30$  (right).

The fractions equations for the three shapes are presented in Table S3 and the equations for the  $G_{fiber}$  of the different units with the different  $n$ 's are presented in Table S4.

**Table S3. Fractions of units ( $f_m$ ) with  $m$  faces exposed to the solvent for the different regular shapes.**

|                     | Triangle (Tr)                    | Square (Sq)                 | Hexagon (Hx)                                |
|---------------------|----------------------------------|-----------------------------|---------------------------------------------|
| <b>Buried</b>       | $f_0 = \frac{d^2 - 3d + 3}{d^2}$ | $f_0 = \frac{(d-2)^2}{d^2}$ | $f_0 = \frac{3d^2 - 9d + 7}{3d^2 - 3d + 1}$ |
| <b>Fiber side</b>   | $f_1 = \frac{3(d-2)}{d^2}$       | $f_1 = \frac{4(d-2)}{d^2}$  | $f_2 = \frac{6(d-2)}{3d^2 - 3d + 1}$        |
| <b>Fiber corner</b> | $f_2 = \frac{3}{d^2}$            | $f_2 = \frac{4}{d^2}$       | $f_3 = \frac{6}{3d^2 - 3d + 1}$             |

**Table S4. Expressions for the calculation of the fiber Gibbs energy ( $G_{fiber}$ ) for the different regular shapes.**

|                       |                                                                                                                                               |
|-----------------------|-----------------------------------------------------------------------------------------------------------------------------------------------|
| <b>Tr<sub>1</sub></b> | $G_{fiber} = (f_2 + f_1) \cdot \gamma_{ls} + f_0 \cdot \gamma_{lb} + f_2 \cdot \gamma_{ks} + (3f_2 + 4f_1 + 4f_0) \cdot \gamma_{kb}$          |
| <b>Sq<sub>1</sub></b> | $G_{fiber} = (f_2 + f_1) \cdot \gamma_{ls} + f_0 \cdot \gamma_{lb} + f_2 \cdot \gamma_{ks} + (4f_2 + 5f_1 + 5f_0) \cdot \gamma_{kb}$          |
| <b>Hx<sub>1</sub></b> | $G_{fiber} = (f_3 + f_2) \cdot \gamma_{ls} + f_0 \cdot \gamma_{lb} + (2f_3 + f_2) \cdot \gamma_{ks} + (5f_3 + 6f_2 + 7f_0) \cdot \gamma_{kb}$ |
| <b>Tr<sub>2</sub></b> | $G_{fiber} = (2f_2 + f_1) \cdot \gamma_{ls} + (f_1 + 2f_0) \cdot \gamma_{lb} + (3f_2 + 3f_1 + 3f_0) \cdot \gamma_{kb}$                        |
| <b>Sq<sub>2</sub></b> | $G_{fiber} = (2f_2 + f_1) \cdot \gamma_{ls} + (f_1 + 2f_0) \cdot \gamma_{lb} + (4f_2 + 4f_1 + 4f_0) \cdot \gamma_{kb}$                        |
| <b>Hx<sub>2</sub></b> | $G_{fiber} = (2f_3 + 2f_2) \cdot \gamma_{ls} + 2f_0 \cdot \gamma_{lb} + f_3 \cdot \gamma_{ks} + (5f_3 + 6f_2 + 6f_0) \cdot \gamma_{kb}$       |
| <b>Hx<sub>3</sub></b> | $G_{fiber} = (3f_3 + 2f_2) \cdot \gamma_{ls} + (f_2 + 3f_0) \cdot \gamma_{lb} + (5f_3 + 5f_2 + 5f_0) \cdot \gamma_{kb}$                       |

**Table S5. Expressions and minimum values for the crystal Gibbs energies ( $G_{crys}$ ) and solvation excess Gibbs energies ( $G_{solv}$ ) for the different regular shapes.**

|                       | $G_{crys}$                                  | $G_{solv}$                                  | $G_{crys,min}$ | $G_{solv,min}$ |
|-----------------------|---------------------------------------------|---------------------------------------------|----------------|----------------|
| <b>Tr<sub>1</sub></b> | $\gamma_{lb} + 4 \cdot \gamma_{kb}$         | $\gamma_{ls} + 4 \cdot \gamma_{ks}$         | 4              | 8              |
| <b>Sq<sub>1</sub></b> | $\gamma_{lb} + 5 \cdot \gamma_{kb}$         | $\gamma_{ls} + 5 \cdot \gamma_{ks}$         | 5              | 10             |
| <b>Hx<sub>1</sub></b> | $\gamma_{lb} + 7 \cdot \gamma_{kb}$         | $\gamma_{ls} + 7 \cdot \gamma_{ks}$         | 7              | 14             |
| <b>Tr<sub>2</sub></b> | $2 \cdot \gamma_{lb} + 3 \cdot \gamma_{kb}$ | $2 \cdot \gamma_{ls} + 3 \cdot \gamma_{ks}$ | 3              | 6              |
| <b>Sq<sub>2</sub></b> | $2 \cdot \gamma_{lb} + 4 \cdot \gamma_{kb}$ | $2 \cdot \gamma_{ls} + 4 \cdot \gamma_{ks}$ | 4              | 8              |
| <b>Hx<sub>2</sub></b> | $2 \cdot \gamma_{lb} + 6 \cdot \gamma_{kb}$ | $2 \cdot \gamma_{ls} + 6 \cdot \gamma_{ks}$ | 6              | 12             |
| <b>Hx<sub>3</sub></b> | $3 \cdot \gamma_{lb} + 5 \cdot \gamma_{kb}$ | $3 \cdot \gamma_{ls} + 5 \cdot \gamma_{ks}$ | 5              | 10             |

The results are separated in amphiphilic ( $n < m_{max}$ ) and non-amphiphilic ( $n = m_{max}$ ) fibers. The  $\Delta G_{fiber}$  plots as a function of  $\gamma_{ks}$  for amphiphilic fibers (Fig. S3) use a fixed value of  $\gamma_{lb}$  ( $=2$ ). They show a similar profile for  $Tr_1$  and  $Sq_1$  (Fig. S3 A and B). Both shapes ( $n=1$ ) present values of  $\Delta G_{fiber}$  lower than 0 and with  $d_{min}$  lower than 10 for a wide range of  $\gamma_{ks}$ . The global minimum in the surface appears at the minimum value of  $\gamma_{ks}$ , which involves the minimum possible destabilization that results from exposing a solvophobic face to solvent. It corresponds with the minimum value of  $d_{min}$  and hence the thinnest fiber ( $d=3$ ). As  $\gamma_{ks}$  increases the thermodynamically favored fiber is wider because that reduces the fraction of solvophobic faces exposed to the solvent ( $f_2$ , Fig. S2). But even after increasing it by a factor of 4, the fiber width is only 3 times greater.

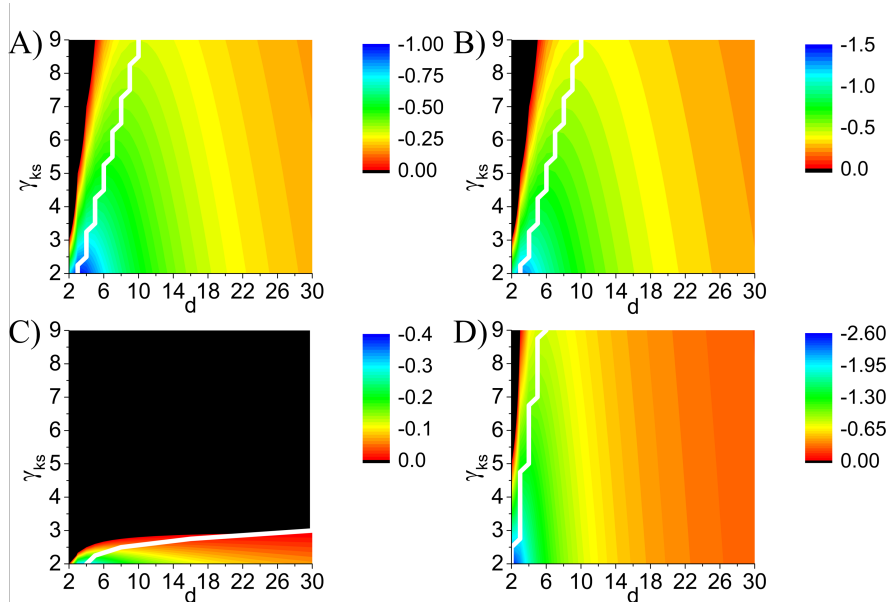

**Figure S3.**  $\Delta G_{\text{fiber}}$  as a function of  $d$  and  $\gamma_{ks}$  with fixed  $\gamma_{lb}$  for amphiphilic fibers:  $Tr_1$  (A),  $Sq_1$  (B),  $Hx_1$  (C) and  $Hx_2$  (D).  $d_{\text{min}}$  is represented with a white line.

The plot for the  $Hx_1$  clearly differs from the rest (Fig. S3 C). This plot shows that  $d_{\text{min}}$  rises faster when increasing the value of  $\gamma_{ks}$  than for the other cases. Even for values of  $\gamma_{ks}$  only slightly greater than 3,  $d_{\text{min}}$  is already higher than 30, which suggest that the fiber is not the thermodynamic favored product on this case. This is not surprising because for this shape more than the half of the faces exposed to solvent are solvophobic. This can only be stable when the loss of stabilization due to this exposure is very low, as shown in the graph. Nevertheless, when the  $Hx$  unit has two solvophilic faces ( $Hx_2$ ), it reduces the number of solvophobic faces exposed to the solvent to almost the half and the plot shows a profile more similar to the  $Tr_1$  and  $Sq_1$  (Fig. S3 A and B). It actually tends to form thinner fibers than these, due to the fact that  $N$  increases faster with  $d$  for the  $Hx$  and hence the number of core units with solvophilic faces buried as well (Fig. S2).

The  $\Delta G_{fiber}$  plots as a function of  $\gamma_{lb}$  (Fig. S4) take into account that  $G_{crys} < G_{solv}$ , and hence, the fixed value for  $G_{solv}$  is the highest  $G_{crys}$  in the plot range plus 1. The value of  $\gamma_{ks}$  is then calculated: 3.5 ( $Tr_1$ ), 3 ( $Sq_1$ ), 2.4 ( $Hx_1$ ) and 3.8 ( $Hx_2$ ).

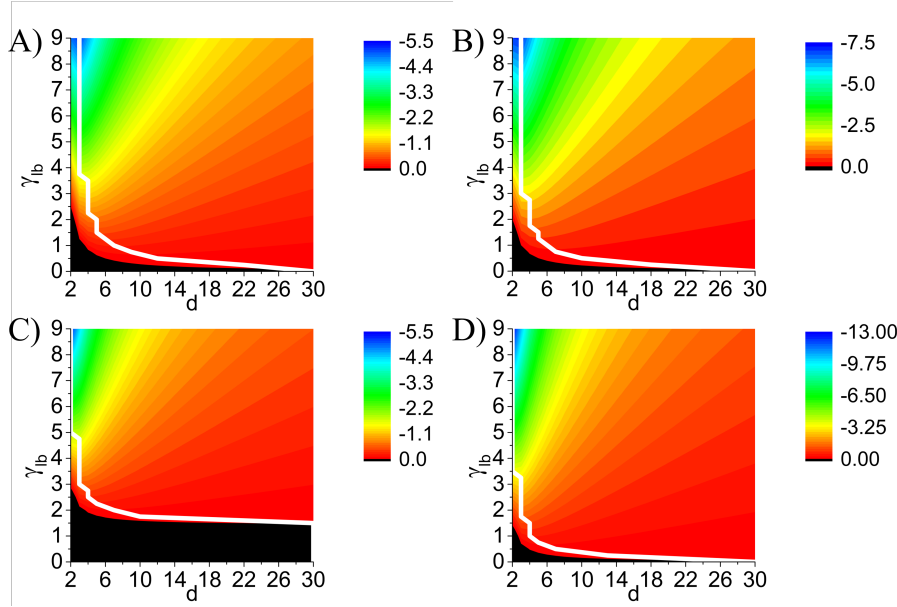

**Figure S4.**  $\Delta G_{fiber}$  as a function of  $d$  and  $\gamma_{lb}$  with fixed  $\gamma_{ks}$  for amphiphilic fibers:  $Tr_1$  (A),  $Sq_1$  (B),  $Hx_1$  (C) and  $Hx_2$  (D).  $d_{min}$  is represented with a white line.

The  $\Delta G_{fiber}$  plots show similar profiles for the four cases (Fig. S4). All show a minimum with  $\Delta G_{fiber}$  lower than 0. This is a shallow minimum for low values of  $\gamma_{lb}$  which becomes deeper as the parameter increases.  $d_{min}$  also decreases as this parameter rises. These tendencies are due to the increasing destabilization of the buried solvophilic faces with the parameter  $\gamma_{lb}$ , which also enhances the destabilizing effect of increasing  $d$ . In general, the minimum  $d_{min}$  correspond to the minimum difference between  $G_{crys}$  and  $G_{solv}$ . This is consistent with the experimental observations which shows that molecules with a limited solubility have a higher tendency to form fibers. Bigger fibers are expected as this difference gets higher ( $G_{crys} \ll G_{solv}$ ).

For non-amphiphilic fibers ( $Tr_2$ ,  $Sq_2$  and  $Hx_3$ ) the trends in the plots are different to the previous (Fig. S5). First of all, as there is no solvophobic face exposed to the solvent there is no dependence with the parameter  $\gamma_{ks}$  and therefore the plots with the fixed  $\gamma_{lb}$  are only shown as a function of  $d$  (Fig. S5 D). All the plots show negative  $\Delta G_{fiber}$  supporting the idea that also non-amphiphilic fibers can also be at thermodynamic equilibrium. Furthermore, the  $d_{min}$  adopts the minimum possible value in all the cases ( $d=2$ ) because the only destabilizing effect corresponds to burying solvophilic faces, the number of which increases with  $d$ .

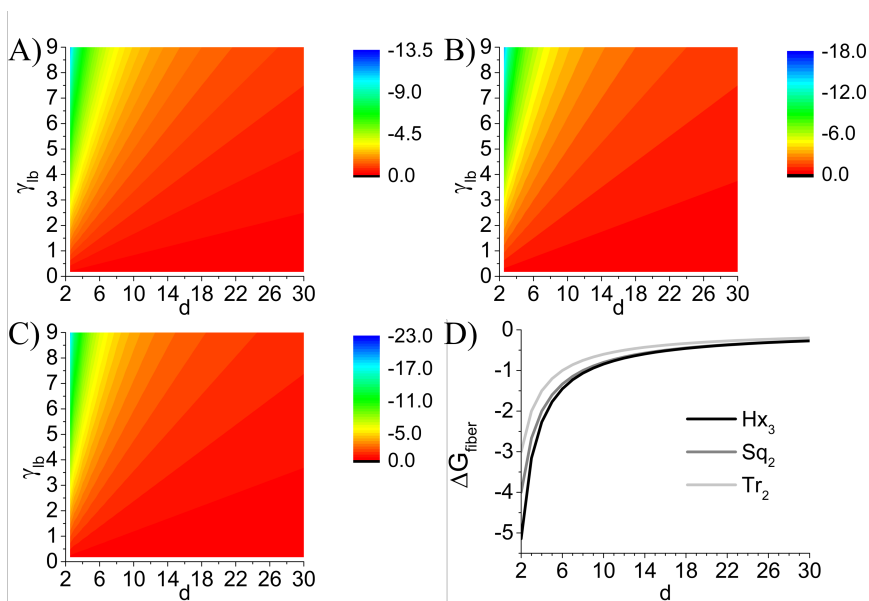

**Figure S5.**  $\Delta G_{fiber}$  for non-amphiphilic fibers as a function of  $d$  and:  $\gamma_{lb}$  with fixed  $\gamma_{ks}$   $Tr_2$  (A),  $Sq_2$  (B),  $Hx_3$  (C) and with fixed  $\gamma_{lb}$  for  $Tr_2$ ,  $Sq_2$  and  $Hx_3$  (D).  $d_{min}$  is represented with a white line in graphs A-C.

The fact that similar results are obtained even changing the shape of the units confirms the validity of the model and gives more possibilities to mimic real systems.

### Irregular Shapes: 3D Cross Section for $Hx$ .

Experimentally there are other types of nanostructures besides fibers, like the 2D objects, tapes and sheets. These nanostructures can still be assumed to grow infinitely in the z-direction but they also considerably grow in one direction of the xy-plane.  $Hx$  were reformulated in function of three dimensions ( $d_x$ ,  $d_y$  and  $d_z$ ) in the xy-plane (Fig. S6) using  $Hx_2$  and  $Hx_3$  as units because they showed good results in the one-dimensional formulation.

**Table S6. Fractions of units ( $f_m$ ) with  $m$  faces exposed to the solvent for the  $Hx$  as a function of  $d_x$ ,  $d_y$  and  $d_z$ .**

| <b>Hexagon (Hx)</b> |                                                                                                                              |
|---------------------|------------------------------------------------------------------------------------------------------------------------------|
| <b>Buried</b>       | $f_0 = \frac{(d_x d_y + d_x d_z + d_y d_z) - 3(d_x + d_y + d_z) + 7}{(d_x d_y + d_x d_z + d_y d_z) - (d_x + d_y + d_z) + 1}$ |
| <b>Fiber side</b>   | $f_2 = \frac{2(d_x + d_y + d_z - 6)}{(d_x d_y + d_x d_z + d_y d_z) - (d_x + d_y + d_z) + 1}$                                 |
| <b>Fiber corner</b> | $f_3 = \frac{6}{(d_x d_y + d_x d_z + d_y d_z) - (d_x + d_y + d_z) + 1}$                                                      |

Figure S6. Evolution of the fractions of units which can be buried (green), on the faces of the fiber (blue) and on the corners of the fiber (yellow) as a function of three directions ( $d_x$ ,  $d_y$  and  $d_z$ ) on the cross section plane (xy-plane).

The  $\Delta G_{fiber}$  are shown as a function of two of the dimensions in the xy-plane:  $d_x$  and  $d_y$ . As the three directions are equivalent to each other, this is enough to see if the system tends to grow or not in just one of these dimensions. It can be seen that for non-amphiphilic fibers,  $Hx_3$ , the system shows the minimum excess Gibbs energy for small  $d$ 's with no difference between them (Fig. S7 D-F), suggesting fibers to be the thermodynamic favored product for these systems independently to the different interaction parameters tried. However, the amphiphilic fibers show different behaviors with different interaction parameters (Fig. S7 A-C). The case where the excess energy of burying a solvophilic face is more favorable than exposing a solvophobic face ( $\gamma_{lb} < \gamma_{ks}$ ) the structure clearly shows



(Fig. S7 A) a preference for a 2D growth ( $G_{fiber,min}$  corresponds to  $d_x=30$  and  $d_y=2$ ). For the other two cases the preference is not that clear and the  $G_{fiber}$  is relatively shallow. For the case where both parameters have the same value ( $\gamma_{lb}=\gamma_{ks}$ ) the actual  $\Delta G_{fiber,min}$  (Fig. S7 B) corresponds also to a 2D structure ( $d_x=30$  and  $d_y=2$ ) while when the energy penalty of burying solvophilic faces is greater ( $\gamma_{lb}>\gamma_{ks}$ ) the fibers ( $d_x=d_y=2$ ) are the preferred product (Fig. S7 C).

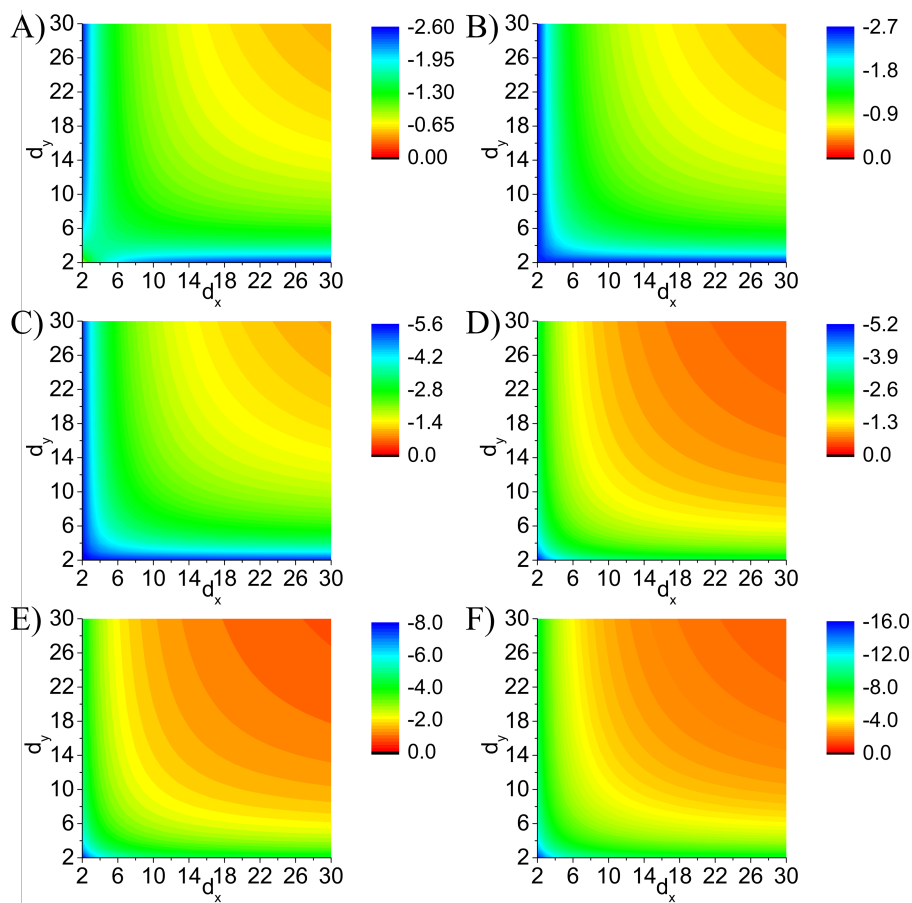

**Figure S7.**  $\Delta G_{fiber}$  as a function of  $d_x$  and  $d_y$  for  $Hx_2$  (A-C) and  $Hx_3$  (D-F) with fixed values of  $\gamma_{lb}$  and  $\gamma_{ks}$ : 2:4 (A), 2:2 (B), 4:2.5 (C), 2:4 (D), 3:3 (E) and 6:5 (F).

### Application to Real LMWG.

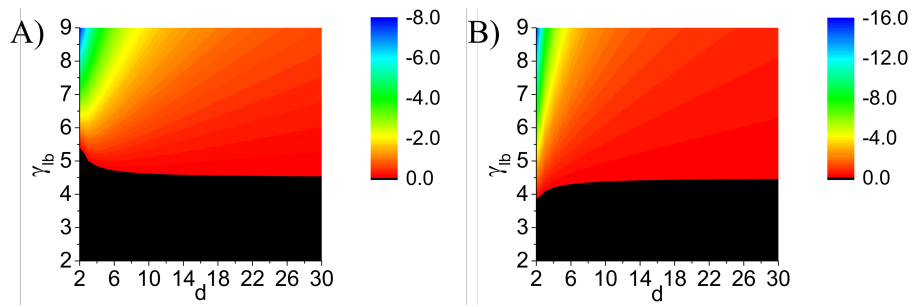

Figure S8.  $\Delta G_{fiber}$  as a function of  $d$  and as a function of  $\gamma_{lb}$  for  $Hx_1$  (A) and  $Hx_{1+1}$  (B). The rest of the parameters change as indicated in Fig. 3 E.
